# Supplementary material
Source: ML conference proceedings conference paper supplement (https://openreview.net/forum?id=EWoAYik8ta)
Supplement: supplementary_material [file attachment]

# Appendix for submission “Exploring Time Granularity on Temporal Graphs for Dynamic Link Prediction in Real-world Networks”

## A Reproducibility

### A.1 Real-word Datasets

Table A.1: Datasets Statistics with associated semantic meanings.

| Dataset          | Domain      | Node                      | # Nodes | Edge                      | Total Edges | Unique Edges | Unique Steps | Duration |
|------------------|-------------|---------------------------|---------|---------------------------|-------------|--------------|--------------|----------|
| Wikipedia [19]   | Social      | Editors & Wiki Pages      | 9,227   | Editing Request           | 157,474     | 18,257       | 152,757      | 1 Month  |
| Reddit [19]      | Social      | Users & Posts             | 10,984  | Posting Request           | 672,447     | 78,516       | 588,918      | 1 Month  |
| MOOC [19]        | Interaction | Students & Online Courses | 7,144   | Accessing a online course | 411,749     | 178,443      | 345,600      | 1 Month  |
| LastFM [19]      | Interaction | Users & Songs             | 1,980   | Listening a song          | 1,293,103   | 154,993      | 1,283,614    | 4 Years  |
| Enron [45]       | Social      | Employees                 | 184     | Email communication       | 125,235     | 3,125        | 22,632       | 3 Years  |
| Social Evo. [46] | Proximity   | Students                  | 74      | Cellphone calls           | 2,099,519   | 4,486        | 565,932      | 1 Year   |
| UCI [47]         | Social      | Students                  | 1,899   | Online Chats              | 59,835      | 20,296       | 58,911       | 196 Days |

### A.2 Data Distribution

Table A.2: Data distribution in a 0.7-0.15-0.15 chronological split for different time granularities.

| Granularity | Wikipedia |        |        | Reddit  |         |         | MOOC    |        |        |
|-------------|-----------|--------|--------|---------|---------|---------|---------|--------|--------|
|             | Train     | Val    | Test   | Train   | Val     | Test    | Train   | Val    | Test   |
| Second      | 110,232   | 23,621 | 23,621 | 470,713 | 100,667 | 100,867 | 288,224 | 61,762 | 61,763 |
| Minute      | 110,237   | 23,620 | 23,617 | 470,722 | 100,858 | 100,867 | 288,224 | 61,770 | 61,755 |
| Hour        | 110,368   | 23,754 | 23,352 | 470,815 | 101,296 | 100,336 | 288,480 | 62,271 | 60,998 |
| Day         | 112,937   | 22,904 | 21,633 | 475,299 | 114,325 | 82,823  | 301,509 | 62,868 | 47,372 |
| Month       | 153,823   | 0      | 3,651  | 650,442 | 0       | 22,005  | 411,749 | 0      | 0      |
| Year        | 157,474   | 0      | 0      | 672,447 | 0       | 0       | 411,749 | 0      | 0      |

  

| Granularity | LastFM    |         |         | Enron   |        |        | Social Evo. |         |         | UCI    |       |       |
|-------------|-----------|---------|---------|---------|--------|--------|-------------|---------|---------|--------|-------|-------|
|             | Train     | Val     | Test    | Train   | Val    | Test   | Train       | Val     | Test    | Train  | Val   | Test  |
| Second      | 905,172   | 193,965 | 193,966 | 87,664  | 18,786 | 18,785 | 1,469,665   | 314,930 | 314,924 | 41,884 | 8,975 | 8,976 |
| Minute      | 905,174   | 193,963 | 193,966 | 87,664  | 18,786 | 18,785 | 1,469,671   | 314,924 | 314,924 | 41,885 | 8,974 | 8,976 |
| Hour        | 905,232   | 193,919 | 193,952 | 87,665  | 18,808 | 18,762 | 1,470,682   | 314,396 | 314,441 | 41,895 | 8,964 | 8,976 |
| Day         | 905,232   | 194,399 | 193,472 | 87,743  | 18,971 | 18,521 | 1,474,123   | 317,858 | 307,538 | 42,079 | 8,790 | 8,966 |
| Month       | 936,951   | 182,053 | 174,099 | 89,523  | 24,162 | 11,550 | 1,668,041   | 424,508 | 6,970   | 49,409 | 3,323 | 7,103 |
| Year        | 1,159,991 | 0       | 133,112 | 105,631 | 19,604 | 0      | 2,099,519   | 0       | 0       | 59,835 | 0     | 0     |

### A.3 Hyperparameters in Model Training

Table A.3: Training Configuration & Hyperparameter Setting for Experiments.

| Hyperparameter               | Value     |
|------------------------------|-----------|
| Learning Rate                | 0.0001    |
| Optimizer                    | Adam      |
| Batch Size                   | 200       |
| Number of Epoches            | 20        |
| Tolerance for Early Stopping | 5 Epoches |
| Dropout Rate                 | 0.1       |
| Attention Heads              | 2         |
| Node Embeddings              | 100       |
| Time Embeddings              | 100       |
| Memory Dimension (TGN)       | 172       |
| Message Dimension (TGN)      | 100       |
| Number of Runs               | 3         |

## 7 B Numerical Results of Cross-granularity Evaluation

Table B.4: AU-ROC of dynamic link prediction on the "second" granularity data across three negative sampling strategies. Note that we report the mean AU-ROC over three runs with the standard deviations in parenthesis, and the rank is computed by averaging the ranks over all datasets.

| (a) Random Sampling    |               |               |               |               |               |               |               |      |
|------------------------|---------------|---------------|---------------|---------------|---------------|---------------|---------------|------|
| Method                 | Wikipedia     | Reddit        | MOOC          | LastFM        | Enron         | Social Evo.   | UCI           | Rank |
| JODIE-s                | 0.992 (0.001) | 0.999 (0.000) | 0.857 (0.015) | 0.999 (0.000) | 0.930 (0.005) | 0.996 (0.000) | 0.994 (0.001) | 3    |
| DyRep-s                | 0.681 (0.010) | 0.566 (0.000) | 0.606 (0.005) | 0.505 (0.009) | 0.643 (0.011) | 0.679 (0.053) | 0.833 (0.001) | 12   |
| TGN-s                  | 0.979 (0.001) | 0.961 (0.000) | 0.789 (0.012) | 0.694 (0.013) | 0.808 (0.019) | 0.923 (0.001) | 0.901 (0.006) | 6    |
| JODIE-m                | 0.993 (0.000) | 0.999 (0.000) | 0.865 (0.007) | 0.999 (0.000) | 0.926 (0.002) | 0.995 (0.001) | 0.995 (0.000) | 1    |
| DyRep-m                | 0.677 (0.011) | 0.561 (0.000) | 0.588 (0.010) | 0.495 (0.005) | 0.634 (0.019) | 0.696 (0.015) | 0.837 (0.008) | 13   |
| TGN-m                  | 0.978 (0.001) | 0.955 (0.000) | 0.805 (0.029) | 0.695 (0.016) | 0.807 (0.020) | 0.869 (0.007) | 0.903 (0.039) | 5    |
| JODIE-h                | 0.992 (0.001) | 0.996 (0.000) | 0.845 (0.018) | 0.997 (0.000) | 0.923 (0.017) | 0.914 (0.000) | 0.995 (0.001) | 2    |
| DyRep-h                | 0.640 (0.011) | 0.496 (0.000) | 0.590 (0.012) | 0.503 (0.000) | 0.593 (0.057) | 0.701 (0.000) | 0.829 (0.016) | 14   |
| TGN-h                  | 0.960 (0.001) | 0.928 (0.000) | 0.688 (0.000) | 0.684 (0.000) | 0.764 (0.027) | 0.562 (0.000) | 0.813 (0.023) | 8    |
| JODIE-d                | 0.976 (0.005) | 0.886 (0.000) | 0.623 (0.000) | 0.928 (0.000) | 0.920 (0.004) | 0.633 (0.000) | 0.994 (0.001) | 4    |
| DyRep-d                | 0.582 (0.032) | 0.462 (0.000) | 0.591 (0.000) | 0.505 (0.000) | 0.649 (0.006) | 0.513 (0.000) | 0.835 (0.009) | 11   |
| TGN-d                  | 0.944 (0.005) | 0.923 (0.000) | 0.570 (0.000) | 0.602 (0.000) | 0.795 (0.016) | 0.595 (0.000) | 0.836 (0.024) | 9    |
| EdgeBank <sub>tw</sub> | 0.888 (0.000) | 0.924 (0.000) | 0.607 (0.000) | 0.840 (0.000) | 0.867 (0.000) | 0.600 (0.000) | 0.733 (0.000) | 7    |
| EdgeBank <sub>∞</sub>  | 0.911 (0.000) | 0.954 (0.000) | 0.548 (0.000) | 0.827 (0.000) | 0.858 (0.000) | 0.538 (0.000) | 0.749 (0.000) | 10   |

  

| (b) Historical Sampling |               |               |               |               |               |               |               |      |
|-------------------------|---------------|---------------|---------------|---------------|---------------|---------------|---------------|------|
| Method                  | Wikipedia     | Reddit        | MOOC          | LastFM        | Enron         | Social Evo.   | UCI           | Rank |
| JODIE-s                 | 0.360 (0.006) | 0.373 (0.007) | 0.147 (0.010) | 0.415 (0.006) | 0.443 (0.002) | 0.621 (0.020) | 0.431 (0.037) | 11   |
| DyRep-s                 | 0.386 (0.003) | 0.421 (0.000) | 0.408 (0.008) | 0.481 (0.017) | 0.590 (0.018) | 0.715 (0.064) | 0.441 (0.016) | 7    |
| TGN-s                   | 0.815 (0.014) | 0.765 (0.000) | 0.695 (0.042) | 0.589 (0.008) | 0.657 (0.003) | 0.885 (0.009) | 0.755 (0.011) | 2    |
| JODIE-m                 | 0.364 (0.002) | 0.372 (0.011) | 0.138 (0.010) | 0.410 (0.010) | 0.445 (0.002) | 0.606 (0.023) | 0.386 (0.006) | 12   |
| DyRep-m                 | 0.370 (0.014) | 0.463 (0.000) | 0.387 (0.003) | 0.464 (0.011) | 0.591 (0.011) | 0.736 (0.010) | 0.425 (0.031) | 9    |
| TGN-m                   | 0.809 (0.003) | 0.735 (0.000) | 0.714 (0.049) | 0.641 (0.031) | 0.656 (0.004) | 0.846 (0.044) | 0.714 (0.063) | 1    |
| JODIE-h                 | 0.360 (0.010) | 0.315 (0.000) | 0.119 (0.002) | 0.328 (0.001) | 0.444 (0.002) | 0.528 (0.000) | 0.383 (0.042) | 14   |
| DyRep-h                 | 0.386 (0.008) | 0.550 (0.000) | 0.431 (0.034) | 0.464 (0.001) | 0.555 (0.046) | 0.763 (0.000) | 0.450 (0.031) | 8    |
| TGN-h                   | 0.734 (0.023) | 0.742 (0.000) | 0.634 (0.001) | 0.618 (0.001) | 0.604 (0.017) | 0.613 (0.000) | 0.648 (0.031) | 5    |
| JODIE-d                 | 0.403 (0.016) | 0.381 (0.000) | 0.223 (0.000) | 0.195 (0.000) | 0.441 (0.001) | 0.521 (0.000) | 0.339 (0.024) | 13   |
| DyRep-d                 | 0.379 (0.001) | 0.449 (0.000) | 0.402 (0.000) | 0.498 (0.000) | 0.590 (0.011) | 0.467 (0.000) | 0.465 (0.017) | 6    |
| TGN-d                   | 0.731 (0.014) | 0.739 (0.000) | 0.702 (0.000) | 0.624 (0.000) | 0.648 (0.030) | 0.629 (0.000) | 0.634 (0.079) | 4    |
| EdgeBank <sub>tw</sub>  | 0.754 (0.000) | 0.748 (0.000) | 0.564 (0.000) | 0.694 (0.000) | 0.606 (0.000) | 0.710 (0.000) | 0.717 (0.000) | 3    |
| EdgeBank <sub>∞</sub>   | 0.492 (0.000) | 0.508 (0.000) | 0.293 (0.000) | 0.493 (0.000) | 0.451 (0.000) | 0.523 (0.000) | 0.381 (0.000) | 10   |

  

| (c) Inductive Sampling |               |               |               |               |               |               |               |      |
|------------------------|---------------|---------------|---------------|---------------|---------------|---------------|---------------|------|
| Method                 | Wikipedia     | Reddit        | MOOC          | LastFM        | Enron         | Social Evo.   | UCI           | Rank |
| JODIE-s                | 0.324 (0.004) | 0.391 (0.005) | 0.325 (0.030) | 0.465 (0.004) | 0.502 (0.001) | 0.626 (0.020) | 0.513 (0.020) | 9    |
| DyRep-s                | 0.607 (0.009) | 0.448 (0.000) | 0.561 (0.003) | 0.505 (0.001) | 0.586 (0.014) | 0.712 (0.053) | 0.480 (0.018) | 6    |
| TGN-s                  | 0.803 (0.008) | 0.802 (0.000) | 0.654 (0.029) | 0.557 (0.005) | 0.691 (0.009) | 0.880 (0.010) | 0.746 (0.024) | 1    |
| JODIE-m                | 0.323 (0.002) | 0.390 (0.008) | 0.308 (0.026) | 0.463 (0.006) | 0.501 (0.002) | 0.610 (0.025) | 0.479 (0.007) | 14   |
| DyRep-m                | 0.584 (0.034) | 0.493 (0.000) | 0.521 (0.013) | 0.499 (0.008) | 0.583 (0.017) | 0.729 (0.012) | 0.471 (0.027) | 8    |
| TGN-m                  | 0.783 (0.006) | 0.790 (0.000) | 0.632 (0.014) | 0.597 (0.025) | 0.690 (0.010) | 0.837 (0.046) | 0.741 (0.030) | 2    |
| JODIE-h                | 0.327 (0.001) | 0.366 (0.000) | 0.248 (0.018) | 0.422 (0.001) | 0.501 (0.005) | 0.526 (0.000) | 0.480 (0.036) | 11   |
| DyRep-h                | 0.590 (0.016) | 0.577 (0.000) | 0.546 (0.000) | 0.497 (0.001) | 0.561 (0.036) | 0.751 (0.000) | 0.490 (0.016) | 7    |
| TGN-h                  | 0.701 (0.010) | 0.743 (0.000) | 0.518 (0.000) | 0.543 (0.001) | 0.657 (0.014) | 0.593 (0.000) | 0.648 (0.009) | 3    |
| JODIE-d                | 0.442 (0.013) | 0.460 (0.000) | 0.458 (0.000) | 0.339 (0.000) | 0.496 (0.001) | 0.515 (0.000) | 0.455 (0.011) | 12   |
| DyRep-d                | 0.576 (0.027) | 0.438 (0.000) | 0.534 (0.000) | 0.514 (0.000) | 0.593 (0.011) | 0.468 (0.000) | 0.507 (0.014) | 5    |
| TGN-d                  | 0.706 (0.011) | 0.724 (0.000) | 0.468 (0.000) | 0.527 (0.000) | 0.672 (0.017) | 0.602 (0.000) | 0.642 (0.019) | 4    |
| EdgeBank <sub>tw</sub> | 0.417 (0.000) | 0.439 (0.000) | 0.189 (0.000) | 0.447 (0.000) | 0.484 (0.000) | 0.677 (0.000) | 0.491 (0.000) | 13   |
| EdgeBank <sub>∞</sub>  | 0.435 (0.000) | 0.465 (0.000) | 0.219 (0.000) | 0.463 (0.000) | 0.468 (0.000) | 0.566 (0.000) | 0.515 (0.000) | 10   |

Table B.5: AU-ROC of dynamic link prediction on the "minute" granularity data across three negative sampling strategies. Note that we report the mean AU-ROC over three runs with the standard deviations in parenthesis, and the rank is computed by averaging the ranks over all datasets.

| (a) Random Sampling    |               |               |               |               |               |               |               |      |
|------------------------|---------------|---------------|---------------|---------------|---------------|---------------|---------------|------|
| Method                 | Wikipedia     | Reddit        | MOOC          | LastFM        | Enron         | Social Evo.   | UCI           | Rank |
| JODIE-s                | 0.992 (0.001) | 0.999 (0.000) | 0.856 (0.015) | 0.999 (0.000) | 0.930 (0.005) | 0.996 (0.000) | 0.994 (0.001) | 2    |
| DyRep-s                | 0.679 (0.009) | 0.568 (0.000) | 0.603 (0.007) | 0.508 (0.008) | 0.634 (0.015) | 0.678 (0.055) | 0.830 (0.002) | 11   |
| TGN-s                  | 0.977 (0.001) | 0.961 (0.000) | 0.752 (0.026) | 0.694 (0.013) | 0.809 (0.017) | 0.847 (0.004) | 0.893 (0.009) | 5    |
| JODIE-m                | 0.993 (0.000) | 0.999 (0.000) | 0.864 (0.007) | 0.999 (0.000) | 0.927 (0.002) | 0.995 (0.001) | 0.995 (0.000) | 1    |
| DyRep-m                | 0.676 (0.010) | 0.559 (0.000) | 0.587 (0.008) | 0.499 (0.004) | 0.629 (0.009) | 0.697 (0.016) | 0.837 (0.010) | 12   |
| TGN-m                  | 0.977 (0.001) | 0.955 (0.000) | 0.802 (0.027) | 0.695 (0.015) | 0.810 (0.017) | 0.875 (0.007) | 0.892 (0.034) | 4    |
| JODIE-h                | 0.992 (0.001) | 0.996 (0.000) | 0.844 (0.020) | 0.997 (0.000) | 0.923 (0.016) | 0.909 (0.000) | 0.995 (0.001) | 3    |
| DyRep-h                | 0.639 (0.012) | 0.498 (0.000) | 0.592 (0.014) | 0.501 (0.000) | 0.590 (0.058) | 0.692 (0.000) | 0.829 (0.017) | 13   |
| TGN-h                  | 0.960 (0.001) | 0.929 (0.000) | 0.688 (0.000) | 0.683 (0.000) | 0.764 (0.027) | 0.601 (0.000) | 0.811 (0.022) | 7    |
| JODIE-d                | 0.976 (0.005) | 0.884 (0.000) | 0.629 (0.000) | 0.930 (0.000) | 0.921 (0.002) | 0.633 (0.000) | 0.994 (0.001) | 6    |
| DyRep-d                | 0.585 (0.032) | 0.464 (0.000) | 0.595 (0.000) | 0.498 (0.000) | 0.637 (0.013) | 0.513 (0.000) | 0.834 (0.009) | 14   |
| TGN-d                  | 0.944 (0.005) | 0.922 (0.000) | 0.570 (0.000) | 0.602 (0.000) | 0.795 (0.015) | 0.595 (0.000) | 0.836 (0.023) | 10   |
| EdgeBank <sub>tw</sub> | 0.888 (0.000) | 0.924 (0.000) | 0.607 (0.000) | 0.840 (0.000) | 0.867 (0.000) | 0.600 (0.000) | 0.733 (0.000) | 8    |
| EdgeBank <sub>∞</sub>  | 0.911 (0.000) | 0.954 (0.000) | 0.548 (0.000) | 0.827 (0.000) | 0.858 (0.000) | 0.538 (0.000) | 0.749 (0.000) | 9    |

  

| (b) Historical Sampling |               |               |               |               |               |               |               |      |
|-------------------------|---------------|---------------|---------------|---------------|---------------|---------------|---------------|------|
| Method                  | Wikipedia     | Reddit        | MOOC          | LastFM        | Enron         | Social Evo.   | UCI           | Rank |
| JODIE-s                 | 0.363 (0.007) | 0.373 (0.007) | 0.148 (0.011) | 0.415 (0.006) | 0.442 (0.001) | 0.620 (0.021) | 0.431 (0.036) | 11   |
| DyRep-s                 | 0.385 (0.005) | 0.423 (0.000) | 0.404 (0.010) | 0.480 (0.019) | 0.576 (0.024) | 0.714 (0.065) | 0.441 (0.017) | 7    |
| TGN-s                   | 0.808 (0.015) | 0.763 (0.000) | 0.685 (0.043) | 0.589 (0.007) | 0.661 (0.001) | 0.845 (0.013) | 0.745 (0.013) | 1    |
| JODIE-m                 | 0.366 (0.003) | 0.372 (0.011) | 0.139 (0.010) | 0.410 (0.011) | 0.443 (0.002) | 0.603 (0.022) | 0.386 (0.006) | 12   |
| DyRep-m                 | 0.367 (0.012) | 0.455 (0.000) | 0.387 (0.003) | 0.454 (0.007) | 0.584 (0.011) | 0.734 (0.015) | 0.423 (0.032) | 8    |
| TGN-m                   | 0.805 (0.002) | 0.732 (0.000) | 0.704 (0.052) | 0.640 (0.030) | 0.661 (0.002) | 0.883 (0.021) | 0.696 (0.062) | 2    |
| JODIE-h                 | 0.362 (0.011) | 0.316 (0.001) | 0.119 (0.002) | 0.327 (0.001) | 0.443 (0.002) | 0.526 (0.000) | 0.384 (0.041) | 14   |
| DyRep-h                 | 0.384 (0.011) | 0.548 (0.000) | 0.429 (0.033) | 0.466 (0.001) | 0.565 (0.050) | 0.754 (0.000) | 0.450 (0.032) | 6    |
| TGN-h                   | 0.736 (0.022) | 0.745 (0.000) | 0.623 (0.001) | 0.614 (0.002) | 0.603 (0.017) | 0.664 (0.000) | 0.644 (0.028) | 5    |
| JODIE-d                 | 0.404 (0.016) | 0.381 (0.001) | 0.220 (0.000) | 0.197 (0.000) | 0.441 (0.001) | 0.521 (0.000) | 0.339 (0.024) | 13   |
| DyRep-d                 | 0.377 (0.003) | 0.454 (0.000) | 0.410 (0.000) | 0.498 (0.000) | 0.580 (0.015) | 0.467 (0.000) | 0.463 (0.018) | 9    |
| TGN-d                   | 0.731 (0.016) | 0.739 (0.000) | 0.700 (0.000) | 0.625 (0.000) | 0.647 (0.031) | 0.629 (0.000) | 0.634 (0.078) | 4    |
| EdgeBank <sub>tw</sub>  | 0.754 (0.000) | 0.748 (0.000) | 0.570 (0.000) | 0.700 (0.000) | 0.606 (0.000) | 0.710 (0.000) | 0.717 (0.000) | 3    |
| EdgeBank <sub>∞</sub>   | 0.492 (0.000) | 0.508 (0.000) | 0.293 (0.000) | 0.493 (0.000) | 0.451 (0.000) | 0.523 (0.000) | 0.381 (0.000) | 10   |

  

| (c) Inductive Sampling |               |               |               |               |               |               |               |      |
|------------------------|---------------|---------------|---------------|---------------|---------------|---------------|---------------|------|
| Method                 | Wikipedia     | Reddit        | MOOC          | LastFM        | Enron         | Social Evo.   | UCI           | Rank |
| JODIE-s                | 0.324 (0.004) | 0.391 (0.005) | 0.326 (0.030) | 0.466 (0.004) | 0.501 (0.001) | 0.627 (0.021) | 0.512 (0.020) | 9    |
| DyRep-s                | 0.608 (0.008) | 0.450 (0.000) | 0.556 (0.005) | 0.510 (0.014) | 0.577 (0.017) | 0.712 (0.054) | 0.479 (0.020) | 6    |
| TGN-s                  | 0.795 (0.009) | 0.801 (0.000) | 0.631 (0.012) | 0.557 (0.005) | 0.695 (0.007) | 0.837 (0.013) | 0.734 (0.025) | 1    |
| JODIE-m                | 0.323 (0.002) | 0.390 (0.008) | 0.308 (0.027) | 0.463 (0.006) | 0.500 (0.002) | 0.609 (0.025) | 0.479 (0.007) | 12   |
| DyRep-m                | 0.583 (0.034) | 0.485 (0.000) | 0.520 (0.012) | 0.485 (0.006) | 0.577 (0.014) | 0.727 (0.016) | 0.470 (0.028) | 7    |
| TGN-m                  | 0.779 (0.004) | 0.789 (0.000) | 0.622 (0.013) | 0.596 (0.024) | 0.694 (0.007) | 0.875 (0.022) | 0.722 (0.030) | 2    |
| JODIE-h                | 0.328 (0.001) | 0.366 (0.000) | 0.249 (0.018) | 0.422 (0.001) | 0.501 (0.004) | 0.525 (0.000) | 0.480 (0.035) | 14   |
| DyRep-h                | 0.589 (0.014) | 0.575 (0.000) | 0.544 (0.006) | 0.485 (0.002) | 0.566 (0.040) | 0.741 (0.000) | 0.489 (0.015) | 5    |
| TGN-h                  | 0.702 (0.010) | 0.749 (0.000) | 0.514 (0.001) | 0.542 (0.000) | 0.656 (0.011) | 0.644 (0.000) | 0.643 (0.007) | 3    |
| JODIE-d                | 0.441 (0.014) | 0.459 (0.001) | 0.456 (0.000) | 0.339 (0.000) | 0.497 (0.001) | 0.515 (0.000) | 0.454 (0.011) | 13   |
| DyRep-d                | 0.581 (0.031) | 0.445 (0.000) | 0.540 (0.000) | 0.516 (0.000) | 0.585 (0.018) | 0.468 (0.000) | 0.504 (0.019) | 8    |
| TGN-d                  | 0.705 (0.011) | 0.725 (0.000) | 0.461 (0.000) | 0.528 (0.000) | 0.673 (0.017) | 0.602 (0.000) | 0.642 (0.019) | 4    |
| EdgeBank <sub>tw</sub> | 0.417 (0.000) | 0.439 (0.000) | 0.189 (0.000) | 0.447 (0.000) | 0.484 (0.000) | 0.677 (0.000) | 0.491 (0.000) | 11   |
| EdgeBank <sub>∞</sub>  | 0.435 (0.000) | 0.465 (0.000) | 0.219 (0.000) | 0.463 (0.000) | 0.468 (0.000) | 0.566 (0.000) | 0.515 (0.000) | 10   |

Table B.6: AU-ROC of dynamic link prediction on the "hour" granularity data across three negative sampling strategies. Note that we report the mean AU-ROC over three runs with the standard deviations in parenthesis, and the rank is computed by averaging the ranks over all datasets.

| (a) Random Sampling    |               |               |               |               |               |               |               |      |
|------------------------|---------------|---------------|---------------|---------------|---------------|---------------|---------------|------|
| Method                 | Wikipedia     | Reddit        | MOOC          | LastFM        | Enron         | Social Evo.   | UCI           | Rank |
| JODIE-s                | 0.991 (0.001) | 0.987 (0.001) | 0.765 (0.012) | 0.993 (0.000) | 0.932 (0.005) | 0.781 (0.052) | 0.994 (0.001) | 3    |
| DyRep-s                | 0.561 (0.011) | 0.483 (0.000) | 0.585 (0.011) | 0.504 (0.007) | 0.636 (0.013) | 0.679 (0.057) | 0.829 (0.003) | 14   |
| TGN-s                  | 0.949 (0.005) | 0.909 (0.000) | 0.616 (0.012) | 0.659 (0.015) | 0.802 (0.025) | 0.677 (0.018) | 0.854 (0.005) | 6    |
| JODIE-m                | 0.993 (0.001) | 0.986 (0.000) | 0.760 (0.002) | 0.993 (0.000) | 0.928 (0.003) | 0.783 (0.040) | 0.995 (0.000) | 2    |
| DyRep-m                | 0.619 (0.027) | 0.531 (0.000) | 0.560 (0.033) | 0.503 (0.009) | 0.644 (0.002) | 0.687 (0.023) | 0.835 (0.013) | 13   |
| TGN-m                  | 0.953 (0.001) | 0.850 (0.000) | 0.618 (0.041) | 0.667 (0.013) | 0.802 (0.025) | 0.657 (0.045) | 0.848 (0.057) | 7    |
| JODIE-h                | 0.992 (0.001) | 0.992 (0.000) | 0.785 (0.009) | 0.993 (0.000) | 0.926 (0.015) | 0.898 (0.000) | 0.995 (0.001) | 1    |
| DyRep-h                | 0.668 (0.016) | 0.659 (0.000) | 0.612 (0.013) | 0.510 (0.000) | 0.607 (0.052) | 0.699 (0.000) | 0.833 (0.013) | 11   |
| TGN-h                  | 0.956 (0.001) | 0.969 (0.000) | 0.708 (0.000) | 0.682 (0.000) | 0.770 (0.025) | 0.810 (0.000) | 0.839 (0.019) | 5    |
| JODIE-d                | 0.978 (0.004) | 0.929 (0.000) | 0.709 (0.000) | 0.939 (0.000) | 0.922 (0.006) | 0.770 (0.000) | 0.994 (0.001) | 4    |
| DyRep-d                | 0.590 (0.020) | 0.539 (0.000) | 0.618 (0.000) | 0.504 (0.000) | 0.647 (0.014) | 0.482 (0.000) | 0.838 (0.008) | 12   |
| TGN-d                  | 0.943 (0.004) | 0.932 (0.000) | 0.618 (0.000) | 0.590 (0.000) | 0.797 (0.017) | 0.664 (0.000) | 0.836 (0.024) | 8    |
| EdgeBank <sub>tw</sub> | 0.888 (0.000) | 0.924 (0.000) | 0.607 (0.000) | 0.840 (0.000) | 0.867 (0.000) | 0.600 (0.000) | 0.733 (0.000) | 9    |
| EdgeBank <sub>∞</sub>  | 0.911 (0.000) | 0.954 (0.000) | 0.548 (0.000) | 0.827 (0.000) | 0.858 (0.000) | 0.538 (0.000) | 0.749 (0.000) | 10   |

  

| (b) Historical Sampling |               |               |               |               |               |               |               |      |
|-------------------------|---------------|---------------|---------------|---------------|---------------|---------------|---------------|------|
| Method                  | Wikipedia     | Reddit        | MOOC          | LastFM        | Enron         | Social Evo.   | UCI           | Rank |
| JODIE-s                 | 0.362 (0.005) | 0.401 (0.000) | 0.133 (0.006) | 0.417 (0.005) | 0.444 (0.004) | 0.451 (0.033) | 0.431 (0.029) | 11   |
| DyRep-s                 | 0.392 (0.010) | 0.504 (0.000) | 0.461 (0.035) | 0.478 (0.021) | 0.590 (0.016) | 0.716 (0.068) | 0.437 (0.014) | 7    |
| TGN-s                   | 0.703 (0.023) | 0.689 (0.000) | 0.597 (0.049) | 0.564 (0.015) | 0.656 (0.011) | 0.750 (0.058) | 0.624 (0.019) | 5    |
| JODIE-m                 | 0.364 (0.002) | 0.401 (0.000) | 0.125 (0.004) | 0.410 (0.014) | 0.446 (0.001) | 0.441 (0.018) | 0.385 (0.014) | 13   |
| DyRep-m                 | 0.399 (0.013) | 0.384 (0.000) | 0.499 (0.082) | 0.463 (0.002) | 0.596 (0.007) | 0.738 (0.013) | 0.425 (0.037) | 8    |
| TGN-m                   | 0.717 (0.004) | 0.665 (0.000) | 0.633 (0.022) | 0.601 (0.035) | 0.656 (0.011) | 0.644 (0.068) | 0.587 (0.102) | 5    |
| JODIE-h                 | 0.360 (0.008) | 0.319 (0.000) | 0.116 (0.003) | 0.326 (0.000) | 0.446 (0.002) | 0.517 (0.000) | 0.382 (0.050) | 14   |
| DyRep-h                 | 0.390 (0.002) | 0.531 (0.000) | 0.418 (0.032) | 0.463 (0.000) | 0.576 (0.042) | 0.754 (0.000) | 0.447 (0.041) | 6    |
| TGN-h                   | 0.726 (0.014) | 0.752 (0.000) | 0.579 (0.001) | 0.605 (0.001) | 0.604 (0.023) | 0.885 (0.000) | 0.697 (0.022) | 1    |
| JODIE-d                 | 0.402 (0.018) | 0.425 (0.000) | 0.128 (0.000) | 0.195 (0.000) | 0.441 (0.001) | 0.493 (0.000) | 0.338 (0.024) | 12   |
| DyRep-d                 | 0.377 (0.009) | 0.481 (0.000) | 0.408 (0.000) | 0.492 (0.000) | 0.593 (0.016) | 0.462 (0.000) | 0.457 (0.025) | 9    |
| TGN-d                   | 0.716 (0.019) | 0.723 (0.000) | 0.634 (0.000) | 0.599 (0.000) | 0.645 (0.037) | 0.781 (0.000) | 0.638 (0.077) | 2    |
| EdgeBank <sub>tw</sub>  | 0.754 (0.000) | 0.748 (0.000) | 0.564 (0.000) | 0.694 (0.000) | 0.606 (0.000) | 0.710 (0.000) | 0.717 (0.000) | 3    |
| EdgeBank <sub>∞</sub>   | 0.492 (0.000) | 0.508 (0.000) | 0.293 (0.000) | 0.493 (0.000) | 0.451 (0.000) | 0.523 (0.000) | 0.381 (0.000) | 10   |

  

| (c) Inductive Sampling |               |               |               |               |               |               |               |      |
|------------------------|---------------|---------------|---------------|---------------|---------------|---------------|---------------|------|
| Method                 | Wikipedia     | Reddit        | MOOC          | LastFM        | Enron         | Social Evo.   | UCI           | Rank |
| JODIE-s                | 0.317 (0.003) | 0.411 (0.000) | 0.261 (0.028) | 0.463 (0.004) | 0.503 (0.001) | 0.450 (0.035) | 0.510 (0.020) | 10   |
| DyRep-s                | 0.604 (0.012) | 0.535 (0.000) | 0.530 (0.002) | 0.508 (0.005) | 0.584 (0.010) | 0.715 (0.062) | 0.478 (0.021) | 6    |
| TGN-s                  | 0.680 (0.011) | 0.675 (0.000) | 0.497 (0.018) | 0.530 (0.019) | 0.690 (0.015) | 0.744 (0.055) | 0.628 (0.033) | 3    |
| JODIE-m                | 0.316 (0.002) | 0.411 (0.001) | 0.243 (0.012) | 0.460 (0.009) | 0.502 (0.003) | 0.439 (0.020) | 0.476 (0.007) | 14   |
| DyRep-m                | 0.634 (0.024) | 0.425 (0.000) | 0.516 (0.011) | 0.512 (0.013) | 0.587 (0.004) | 0.729 (0.011) | 0.472 (0.030) | 7    |
| TGN-m                  | 0.681 (0.006) | 0.663 (0.000) | 0.524 (0.019) | 0.553 (0.026) | 0.690 (0.015) | 0.641 (0.066) | 0.633 (0.056) | 4    |
| JODIE-h                | 0.321 (0.001) | 0.362 (0.001) | 0.226 (0.013) | 0.418 (0.002) | 0.502 (0.003) | 0.519 (0.000) | 0.476 (0.036) | 13   |
| DyRep-h                | 0.598 (0.009) | 0.596 (0.000) | 0.554 (0.006) | 0.509 (0.001) | 0.571 (0.036) | 0.746 (0.000) | 0.485 (0.023) | 5    |
| TGN-h                  | 0.692 (0.007) | 0.800 (0.000) | 0.586 (0.001) | 0.531 (0.000) | 0.658 (0.007) | 0.878 (0.000) | 0.688 (0.003) | 1    |
| JODIE-d                | 0.438 (0.015) | 0.546 (0.001) | 0.264 (0.000) | 0.333 (0.000) | 0.495 (0.001) | 0.491 (0.000) | 0.451 (0.010) | 11   |
| DyRep-d                | 0.569 (0.024) | 0.469 (0.000) | 0.551 (0.000) | 0.507 (0.000) | 0.595 (0.015) | 0.468 (0.000) | 0.495 (0.025) | 8    |
| TGN-d                  | 0.700 (0.016) | 0.731 (0.000) | 0.454 (0.000) | 0.513 (0.000) | 0.671 (0.013) | 0.762 (0.000) | 0.642 (0.022) | 2    |
| EdgeBank <sub>tw</sub> | 0.417 (0.000) | 0.439 (0.000) | 0.189 (0.000) | 0.447 (0.000) | 0.484 (0.000) | 0.677 (0.000) | 0.491 (0.000) | 12   |
| EdgeBank <sub>∞</sub>  | 0.435 (0.000) | 0.465 (0.000) | 0.219 (0.000) | 0.463 (0.000) | 0.468 (0.000) | 0.566 (0.000) | 0.515 (0.000) | 9    |

Table B.7: AU-ROC of dynamic link prediction on the "day" granularity data across three negative sampling strategies. Note that we report the mean AU-ROC over three runs with the standard deviations in parenthesis, and the rank is computed by averaging the ranks over all datasets.

| (a) Random Sampling    |               |               |               |               |               |               |               |      |
|------------------------|---------------|---------------|---------------|---------------|---------------|---------------|---------------|------|
| Method                 | Wikipedia     | Reddit        | MOOC          | LastFM        | Enron         | Social Evo.   | UCI           | Rank |
| JODIE-s                | 0.954 (0.006) | 0.931 (0.014) | 0.697 (0.003) | 0.851 (0.009) | 0.908 (0.001) | 0.628 (0.057) | 0.993 (0.001) | 4    |
| DyRep-s                | 0.582 (0.048) | 0.500 (0.000) | 0.583 (0.023) | 0.510 (0.013) | 0.624 (0.027) | 0.582 (0.023) | 0.828 (0.010) | 14   |
| TGN-s                  | 0.916 (0.006) | 0.876 (0.000) | 0.607 (0.042) | 0.631 (0.019) | 0.738 (0.037) | 0.581 (0.061) | 0.846 (0.019) | 9    |
| JODIE-m                | 0.993 (0.002) | 0.986 (0.001) | 0.760 (0.006) | 0.993 (0.005) | 0.928 (0.006) | 0.600 (0.040) | 0.995 (0.000) | 1    |
| DyRep-m                | 0.619 (0.036) | 0.531 (0.000) | 0.560 (0.030) | 0.503 (0.007) | 0.644 (0.010) | 0.611 (0.017) | 0.835 (0.018) | 12   |
| TGN-m                  | 0.953 (0.003) | 0.850 (0.000) | 0.618 (0.035) | 0.667 (0.011) | 0.802 (0.038) | 0.534 (0.025) | 0.848 (0.058) | 7    |
| JODIE-h                | 0.962 (0.004) | 0.965 (0.000) | 0.700 (0.008) | 0.857 (0.000) | 0.897 (0.014) | 0.731 (0.053) | 0.994 (0.001) | 2    |
| DyRep-h                | 0.641 (0.015) | 0.524 (0.000) | 0.592 (0.000) | 0.501 (0.000) | 0.590 (0.070) | 0.615 (0.033) | 0.831 (0.016) | 13   |
| TGN-h                  | 0.923 (0.012) | 0.952 (0.000) | 0.703 (0.000) | 0.631 (0.000) | 0.766 (0.040) | 0.625 (0.039) | 0.800 (0.025) | 6    |
| JODIE-d                | 0.979 (0.002) | 0.942 (0.000) | 0.692 (0.000) | 0.868 (0.000) | 0.914 (0.001) | 0.692 (0.003) | 0.993 (0.001) | 3    |
| DyRep-d                | 0.692 (0.005) | 0.610 (0.000) | 0.615 (0.000) | 0.519 (0.000) | 0.654 (0.010) | 0.532 (0.014) | 0.834 (0.007) | 11   |
| TGN-d                  | 0.947 (0.001) | 0.963 (0.000) | 0.638 (0.000) | 0.636 (0.000) | 0.783 (0.029) | 0.761 (0.032) | 0.843 (0.026) | 5    |
| EdgeBank <sub>tw</sub> | 0.890 (0.000) | 0.920 (0.000) | 0.610 (0.000) | 0.840 (0.000) | 0.870 (0.000) | 0.600 (0.000) | 0.730 (0.000) | 8    |
| EdgeBank <sub>∞</sub>  | 0.910 (0.000) | 0.950 (0.000) | 0.550 (0.000) | 0.830 (0.000) | 0.860 (0.000) | 0.540 (0.000) | 0.750 (0.000) | 10   |

  

| (b) Historical Sampling |               |               |               |               |               |               |               |      |
|-------------------------|---------------|---------------|---------------|---------------|---------------|---------------|---------------|------|
| Method                  | Wikipedia     | Reddit        | MOOC          | LastFM        | Enron         | Social Evo.   | UCI           | Rank |
| JODIE-s                 | 0.361 (0.002) | 0.366 (0.008) | 0.153 (0.003) | 0.372 (0.001) | 0.432 (0.003) | 0.402 (0.043) | 0.430 (0.030) | 12   |
| DyRep-s                 | 0.408 (0.004) | 0.476 (0.000) | 0.479 (0.048) | 0.463 (0.015) | 0.580 (0.021) | 0.613 (0.034) | 0.440 (0.022) | 7    |
| TGN-s                   | 0.688 (0.014) | 0.684 (0.000) | 0.590 (0.056) | 0.533 (0.032) | 0.633 (0.010) | 0.657 (0.055) | 0.637 (0.028) | 5    |
| JODIE-m                 | 0.364 (0.003) | 0.401 (0.005) | 0.125 (0.006) | 0.410 (0.001) | 0.446 (0.001) | 0.380 (0.030) | 0.385 (0.023) | 13   |
| DyRep-m                 | 0.399 (0.013) | 0.384 (0.000) | 0.499 (0.050) | 0.463 (0.003) | 0.596 (0.008) | 0.645 (0.011) | 0.425 (0.028) | 9    |
| TGN-m                   | 0.717 (0.014) | 0.665 (0.000) | 0.633 (0.048) | 0.601 (0.036) | 0.656 (0.011) | 0.583 (0.061) | 0.587 (0.100) | 4    |
| JODIE-h                 | 0.358 (0.001) | 0.385 (0.001) | 0.142 (0.011) | 0.368 (0.000) | 0.431 (0.001) | 0.480 (0.046) | 0.387 (0.040) | 14   |
| DyRep-h                 | 0.383 (0.008) | 0.576 (0.000) | 0.461 (0.005) | 0.441 (0.001) | 0.570 (0.039) | 0.651 (0.034) | 0.448 (0.035) | 8    |
| TGN-h                   | 0.692 (0.042) | 0.739 (0.000) | 0.494 (0.002) | 0.618 (0.000) | 0.603 (0.047) | 0.721 (0.053) | 0.646 (0.007) | 3    |
| JODIE-d                 | 0.383 (0.010) | 0.431 (0.001) | 0.144 (0.000) | 0.209 (0.000) | 0.433 (0.001) | 0.452 (0.013) | 0.337 (0.020) | 11   |
| DyRep-d                 | 0.391 (0.003) | 0.485 (0.001) | 0.404 (0.000) | 0.500 (0.000) | 0.599 (0.015) | 0.489 (0.016) | 0.452 (0.020) | 6    |
| TGN-d                   | 0.702 (0.024) | 0.764 (0.000) | 0.627 (0.000) | 0.588 (0.000) | 0.637 (0.044) | 0.830 (0.022) | 0.637 (0.071) | 1    |
| EdgeBank <sub>tw</sub>  | 0.754 (0.000) | 0.748 (0.000) | 0.564 (0.000) | 0.694 (0.000) | 0.606 (0.000) | 0.710 (0.000) | 0.717 (0.000) | 2    |
| EdgeBank <sub>∞</sub>   | 0.492 (0.000) | 0.508 (0.000) | 0.293 (0.000) | 0.493 (0.000) | 0.451 (0.000) | 0.523 (0.000) | 0.381 (0.000) | 10   |

  

| (c) Inductive Sampling |               |               |               |               |               |               |               |      |
|------------------------|---------------|---------------|---------------|---------------|---------------|---------------|---------------|------|
| Method                 | Wikipedia     | Reddit        | MOOC          | LastFM        | Enron         | Social Evo.   | UCI           | Rank |
| JODIE-s                | 0.310 (0.001) | 0.433 (0.009) | 0.209 (0.017) | 0.426 (0.001) | 0.490 (0.003) | 0.414 (0.040) | 0.500 (0.020) | 11   |
| DyRep-s                | 0.566 (0.015) | 0.519 (0.000) | 0.534 (0.050) | 0.508 (0.008) | 0.584 (0.017) | 0.606 (0.026) | 0.488 (0.025) | 5    |
| TGN-s                  | 0.665 (0.009) | 0.673 (0.000) | 0.515 (0.039) | 0.508 (0.027) | 0.645 (0.030) | 0.637 (0.043) | 0.640 (0.024) | 4    |
| JODIE-m                | 0.316 (0.003) | 0.411 (0.007) | 0.243 (0.008) | 0.460 (0.001) | 0.502 (0.001) | 0.389 (0.026) | 0.476 (0.019) | 12   |
| DyRep-m                | 0.634 (0.010) | 0.425 (0.000) | 0.516 (0.032) | 0.512 (0.009) | 0.587 (0.014) | 0.632 (0.008) | 0.472 (0.024) | 8    |
| TGN-m                  | 0.681 (0.011) | 0.663 (0.000) | 0.524 (0.009) | 0.553 (0.009) | 0.690 (0.031) | 0.595 (0.068) | 0.633 (0.063) | 3    |
| JODIE-h                | 0.306 (0.001) | 0.453 (0.001) | 0.191 (0.007) | 0.424 (0.001) | 0.484 (0.004) | 0.494 (0.052) | 0.472 (0.029) | 14   |
| DyRep-h                | 0.532 (0.017) | 0.606 (0.000) | 0.498 (0.014) | 0.487 (0.002) | 0.566 (0.037) | 0.632 (0.040) | 0.492 (0.017) | 6    |
| TGN-h                  | 0.649 (0.017) | 0.796 (0.000) | 0.489 (0.001) | 0.529 (0.001) | 0.656 (0.014) | 0.691 (0.046) | 0.650 (0.004) | 2    |
| JODIE-d                | 0.338 (0.009) | 0.562 (0.001) | 0.212 (0.000) | 0.321 (0.000) | 0.489 (0.002) | 0.461 (0.008) | 0.439 (0.016) | 13   |
| DyRep-d                | 0.467 (0.011) | 0.522 (0.000) | 0.513 (0.000) | 0.510 (0.000) | 0.595 (0.011) | 0.489 (0.019) | 0.492 (0.019) | 7    |
| TGN-d                  | 0.689 (0.015) | 0.825 (0.001) | 0.527 (0.000) | 0.563 (0.000) | 0.672 (0.020) | 0.809 (0.027) | 0.647 (0.021) | 1    |
| EdgeBank <sub>tw</sub> | 0.417 (0.000) | 0.439 (0.000) | 0.189 (0.000) | 0.447 (0.000) | 0.484 (0.000) | 0.677 (0.000) | 0.491 (0.000) | 10   |
| EdgeBank <sub>∞</sub>  | 0.435 (0.000) | 0.465 (0.000) | 0.219 (0.000) | 0.463 (0.000) | 0.468 (0.000) | 0.566 (0.000) | 0.515 (0.000) | 9    |

Table B.8: AP of dynamic link prediction on the "second" granularity data across three negative sampling strategies. Note that we report the mean AP over three runs with the standard deviations in parenthesis, and the rank is computed by averaging the ranks over all datasets.

| (a) Random Sampling    |               |               |               |               |               |               |               |      |
|------------------------|---------------|---------------|---------------|---------------|---------------|---------------|---------------|------|
| Method                 | Wikipedia     | Reddit        | MOOC          | LastFM        | Enron         | Social Evo.   | UCI           | Rank |
| JODIE-s                | 0.993 (0.001) | 0.999 (0.000) | 0.840 (0.018) | 1.000 (0.000) | 0.931 (0.006) | 0.995 (0.000) | 0.993 (0.001) | 3    |
| DyRep-s                | 0.682 (0.008) | 0.563 (0.000) | 0.614 (0.005) | 0.527 (0.003) | 0.642 (0.014) | 0.728 (0.032) | 0.832 (0.002) | 12   |
| TGN-s                  | 0.981 (0.001) | 0.963 (0.000) | 0.764 (0.014) | 0.697 (0.014) | 0.790 (0.021) | 0.902 (0.001) | 0.903 (0.005) | 6    |
| JODIE-m                | 0.994 (0.000) | 1.000 (0.000) | 0.848 (0.010) | 0.999 (0.000) | 0.926 (0.003) | 0.995 (0.001) | 0.994 (0.001) | 1    |
| DyRep-m                | 0.684 (0.005) | 0.565 (0.000) | 0.597 (0.008) | 0.518 (0.004) | 0.629 (0.020) | 0.679 (0.034) | 0.831 (0.006) | 13   |
| TGN-m                  | 0.980 (0.001) | 0.954 (0.000) | 0.779 (0.024) | 0.699 (0.015) | 0.789 (0.022) | 0.821 (0.008) | 0.907 (0.036) | 5    |
| JODIE-h                | 0.994 (0.001) | 0.996 (0.000) | 0.847 (0.018) | 0.998 (0.000) | 0.925 (0.018) | 0.861 (0.000) | 0.994 (0.001) | 2    |
| DyRep-h                | 0.656 (0.014) | 0.514 (0.000) | 0.602 (0.007) | 0.526 (0.000) | 0.600 (0.042) | 0.679 (0.000) | 0.818 (0.020) | 14   |
| TGN-h                  | 0.962 (0.001) | 0.923 (0.000) | 0.660 (0.000) | 0.685 (0.000) | 0.727 (0.029) | 0.533 (0.000) | 0.790 (0.019) | 8    |
| JODIE-d                | 0.978 (0.006) | 0.884 (0.000) | 0.643 (0.000) | 0.936 (0.000) | 0.920 (0.004) | 0.611 (0.000) | 0.994 (0.001) | 4    |
| DyRep-d                | 0.605 (0.027) | 0.490 (0.000) | 0.608 (0.000) | 0.526 (0.000) | 0.650 (0.003) | 0.506 (0.000) | 0.834 (0.006) | 11   |
| TGN-d                  | 0.944 (0.004) | 0.918 (0.000) | 0.557 (0.000) | 0.602 (0.000) | 0.760 (0.014) | 0.543 (0.000) | 0.836 (0.027) | 9    |
| EdgeBank <sub>tw</sub> | 0.887 (0.000) | 0.921 (0.000) | 0.576 (0.000) | 0.784 (0.000) | 0.826 (0.000) | 0.556 (0.000) | 0.730 (0.000) | 7    |
| EdgeBank <sub>∞</sub>  | 0.908 (0.000) | 0.949 (0.000) | 0.529 (0.000) | 0.761 (0.000) | 0.811 (0.000) | 0.520 (0.000) | 0.739 (0.000) | 10   |

  

| (b) Historical Sampling |               |               |               |               |               |               |               |      |
|-------------------------|---------------|---------------|---------------|---------------|---------------|---------------|---------------|------|
| Method                  | Wikipedia     | Reddit        | MOOC          | LastFM        | Enron         | Social Evo.   | UCI           | Rank |
| JODIE-s                 | 0.417 (0.002) | 0.435 (0.003) | 0.336 (0.002) | 0.454 (0.003) | 0.440 (0.001) | 0.517 (0.012) | 0.457 (0.021) | 11   |
| DyRep-s                 | 0.418 (0.001) | 0.437 (0.000) | 0.427 (0.003) | 0.476 (0.011) | 0.585 (0.021) | 0.717 (0.040) | 0.440 (0.007) | 7    |
| TGN-s                   | 0.827 (0.019) | 0.746 (0.000) | 0.644 (0.043) | 0.628 (0.010) | 0.649 (0.014) | 0.916 (0.010) | 0.777 (0.013) | 2    |
| JODIE-m                 | 0.419 (0.001) | 0.434 (0.005) | 0.334 (0.003) | 0.451 (0.006) | 0.441 (0.001) | 0.508 (0.013) | 0.430 (0.005) | 12   |
| DyRep-m                 | 0.411 (0.006) | 0.457 (0.000) | 0.417 (0.002) | 0.463 (0.006) | 0.588 (0.011) | 0.698 (0.029) | 0.435 (0.016) | 9    |
| TGN-m                   | 0.804 (0.016) | 0.704 (0.000) | 0.644 (0.046) | 0.684 (0.034) | 0.649 (0.014) | 0.820 (0.060) | 0.748 (0.056) | 1    |
| JODIE-h                 | 0.416 (0.004) | 0.403 (0.000) | 0.329 (0.001) | 0.407 (0.000) | 0.441 (0.001) | 0.469 (0.000) | 0.429 (0.023) | 14   |
| DyRep-h                 | 0.419 (0.004) | 0.519 (0.000) | 0.434 (0.012) | 0.463 (0.001) | 0.558 (0.032) | 0.725 (0.000) | 0.445 (0.014) | 8    |
| TGN-h                   | 0.721 (0.023) | 0.713 (0.000) | 0.565 (0.001) | 0.644 (0.001) | 0.588 (0.011) | 0.579 (0.000) | 0.623 (0.036) | 5    |
| JODIE-d                 | 0.417 (0.007) | 0.409 (0.000) | 0.354 (0.000) | 0.347 (0.000) | 0.440 (0.000) | 0.471 (0.000) | 0.405 (0.011) | 13   |
| DyRep-d                 | 0.414 (0.001) | 0.455 (0.000) | 0.421 (0.000) | 0.471 (0.000) | 0.590 (0.005) | 0.454 (0.000) | 0.459 (0.013) | 6    |
| TGN-d                   | 0.709 (0.037) | 0.716 (0.000) | 0.633 (0.000) | 0.622 (0.000) | 0.627 (0.029) | 0.549 (0.000) | 0.614 (0.091) | 4    |
| EdgeBank <sub>tw</sub>  | 0.689 (0.000) | 0.676 (0.000) | 0.541 (0.000) | 0.627 (0.000) | 0.568 (0.000) | 0.633 (0.000) | 0.701 (0.000) | 3    |
| EdgeBank <sub>∞</sub>   | 0.496 (0.000) | 0.504 (0.000) | 0.432 (0.000) | 0.497 (0.000) | 0.483 (0.000) | 0.512 (0.000) | 0.455 (0.000) | 10   |

  

| (c) Inductive Sampling |               |               |               |               |               |               |               |      |
|------------------------|---------------|---------------|---------------|---------------|---------------|---------------|---------------|------|
| Method                 | Wikipedia     | Reddit        | MOOC          | LastFM        | Enron         | Social Evo.   | UCI           | Rank |
| JODIE-s                | 0.412 (0.002) | 0.443 (0.003) | 0.444 (0.028) | 0.477 (0.002) | 0.473 (0.000) | 0.519 (0.012) | 0.501 (0.013) | 9    |
| DyRep-s                | 0.626 (0.005) | 0.481 (0.000) | 0.599 (0.002) | 0.519 (0.002) | 0.586 (0.018) | 0.714 (0.036) | 0.491 (0.005) | 6    |
| TGN-s                  | 0.840 (0.007) | 0.833 (0.000) | 0.658 (0.027) | 0.601 (0.008) | 0.693 (0.011) | 0.910 (0.010) | 0.782 (0.025) | 1    |
| JODIE-m                | 0.411 (0.001) | 0.443 (0.004) | 0.430 (0.014) | 0.476 (0.004) | 0.473 (0.001) | 0.510 (0.015) | 0.480 (0.006) | 14   |
| DyRep-m                | 0.614 (0.025) | 0.509 (0.000) | 0.558 (0.015) | 0.511 (0.006) | 0.582 (0.017) | 0.691 (0.032) | 0.499 (0.017) | 8    |
| TGN-m                  | 0.807 (0.005) | 0.807 (0.000) | 0.628 (0.022) | 0.640 (0.029) | 0.692 (0.011) | 0.808 (0.061) | 0.779 (0.024) | 2    |
| JODIE-h                | 0.414 (0.000) | 0.429 (0.000) | 0.411 (0.018) | 0.453 (0.000) | 0.473 (0.002) | 0.467 (0.000) | 0.482 (0.020) | 11   |
| DyRep-h                | 0.617 (0.009) | 0.584 (0.000) | 0.586 (0.005) | 0.510 (0.001) | 0.563 (0.025) | 0.712 (0.000) | 0.500 (0.010) | 7    |
| TGN-h                  | 0.704 (0.009) | 0.764 (0.000) | 0.532 (0.000) | 0.576 (0.000) | 0.641 (0.014) | 0.565 (0.000) | 0.633 (0.019) | 3    |
| JODIE-d                | 0.487 (0.012) | 0.499 (0.000) | 0.518 (0.000) | 0.418 (0.000) | 0.471 (0.000) | 0.471 (0.000) | 0.466 (0.004) | 12   |
| DyRep-d                | 0.608 (0.018) | 0.472 (0.000) | 0.561 (0.000) | 0.524 (0.000) | 0.595 (0.006) | 0.458 (0.000) | 0.516 (0.009) | 5    |
| TGN-d                  | 0.716 (0.023) | 0.744 (0.000) | 0.487 (0.000) | 0.538 (0.000) | 0.659 (0.017) | 0.533 (0.000) | 0.644 (0.038) | 4    |
| EdgeBank <sub>tw</sub> | 0.469 (0.000) | 0.473 (0.000) | 0.417 (0.000) | 0.481 (0.000) | 0.506 (0.000) | 0.609 (0.000) | 0.566 (0.000) | 13   |
| EdgeBank <sub>∞</sub>  | 0.477 (0.000) | 0.485 (0.000) | 0.417 (0.000) | 0.487 (0.000) | 0.497 (0.000) | 0.536 (0.000) | 0.570 (0.000) | 10   |

Table B.9: AP of dynamic link prediction on the "minute" granularity data across three negative sampling strategies. Note that we report the mean AP over three runs with the standard deviations in parenthesis, and the rank is computed by averaging the ranks over all datasets.

| (a) Random Sampling    |               |               |               |               |               |               |               |      |
|------------------------|---------------|---------------|---------------|---------------|---------------|---------------|---------------|------|
| Method                 | Wikipedia     | Reddit        | MOOC          | LastFM        | Enron         | Social Evo.   | UCI           | Rank |
| JODIE-s                | 0.993 (0.001) | 0.999 (0.000) | 0.840 (0.018) | 1.000 (0.000) | 0.931 (0.006) | 0.995 (0.000) | 0.993 (0.001) | 2    |
| DyRep-s                | 0.680 (0.006) | 0.565 (0.000) | 0.611 (0.007) | 0.529 (0.005) | 0.635 (0.014) | 0.731 (0.033) | 0.827 (0.003) | 11   |
| TGN-s                  | 0.979 (0.001) | 0.963 (0.000) | 0.725 (0.023) | 0.697 (0.013) | 0.790 (0.020) | 0.784 (0.011) | 0.895 (0.009) | 5    |
| JODIE-m                | 0.994 (0.000) | 1.000 (0.000) | 0.848 (0.009) | 0.999 (0.000) | 0.928 (0.003) | 0.994 (0.001) | 0.994 (0.001) | 1    |
| DyRep-m                | 0.683 (0.004) | 0.562 (0.000) | 0.596 (0.007) | 0.523 (0.002) | 0.628 (0.010) | 0.677 (0.032) | 0.832 (0.008) | 12   |
| TGN-m                  | 0.979 (0.001) | 0.954 (0.000) | 0.777 (0.024) | 0.697 (0.016) | 0.791 (0.020) | 0.832 (0.009) | 0.897 (0.033) | 4    |
| JODIE-h                | 0.994 (0.001) | 0.996 (0.000) | 0.846 (0.020) | 0.998 (0.000) | 0.924 (0.017) | 0.853 (0.000) | 0.994 (0.001) | 3    |
| DyRep-h                | 0.655 (0.016) | 0.515 (0.000) | 0.603 (0.007) | 0.522 (0.000) | 0.601 (0.042) | 0.668 (0.000) | 0.817 (0.022) | 13   |
| TGN-h                  | 0.962 (0.001) | 0.925 (0.000) | 0.660 (0.000) | 0.682 (0.000) | 0.728 (0.029) | 0.562 (0.000) | 0.791 (0.018) | 7    |
| JODIE-d                | 0.979 (0.006) | 0.882 (0.000) | 0.648 (0.000) | 0.939 (0.000) | 0.921 (0.002) | 0.607 (0.000) | 0.994 (0.001) | 6    |
| DyRep-d                | 0.607 (0.026) | 0.491 (0.000) | 0.609 (0.000) | 0.521 (0.000) | 0.640 (0.011) | 0.516 (0.000) | 0.832 (0.008) | 14   |
| TGN-d                  | 0.945 (0.004) | 0.918 (0.000) | 0.559 (0.000) | 0.601 (0.000) | 0.760 (0.014) | 0.536 (0.000) | 0.836 (0.027) | 10   |
| EdgeBank <sub>tw</sub> | 0.887 (0.000) | 0.921 (0.000) | 0.576 (0.000) | 0.784 (0.000) | 0.826 (0.000) | 0.556 (0.000) | 0.730 (0.000) | 8    |
| EdgeBank <sub>∞</sub>  | 0.908 (0.000) | 0.949 (0.000) | 0.529 (0.000) | 0.761 (0.000) | 0.811 (0.000) | 0.520 (0.000) | 0.739 (0.000) | 9    |

  

| (b) Historical Sampling |               |               |               |               |               |               |               |      |
|-------------------------|---------------|---------------|---------------|---------------|---------------|---------------|---------------|------|
| Method                  | Wikipedia     | Reddit        | MOOC          | LastFM        | Enron         | Social Evo.   | UCI           | Rank |
| JODIE-s                 | 0.418 (0.002) | 0.435 (0.003) | 0.337 (0.002) | 0.454 (0.003) | 0.440 (0.000) | 0.516 (0.012) | 0.456 (0.021) | 11   |
| DyRep-s                 | 0.417 (0.002) | 0.438 (0.000) | 0.425 (0.004) | 0.476 (0.013) | 0.575 (0.024) | 0.719 (0.041) | 0.440 (0.007) | 7    |
| TGN-s                   | 0.821 (0.020) | 0.742 (0.000) | 0.629 (0.043) | 0.626 (0.008) | 0.651 (0.012) | 0.838 (0.017) | 0.767 (0.014) | 1    |
| JODIE-m                 | 0.420 (0.001) | 0.434 (0.005) | 0.335 (0.002) | 0.451 (0.006) | 0.440 (0.001) | 0.507 (0.013) | 0.430 (0.005) | 12   |
| DyRep-m                 | 0.410 (0.005) | 0.453 (0.000) | 0.417 (0.001) | 0.460 (0.004) | 0.584 (0.011) | 0.694 (0.027) | 0.434 (0.016) | 8    |
| TGN-m                   | 0.802 (0.020) | 0.702 (0.000) | 0.636 (0.047) | 0.683 (0.033) | 0.651 (0.012) | 0.881 (0.039) | 0.732 (0.056) | 2    |
| JODIE-h                 | 0.417 (0.004) | 0.403 (0.000) | 0.330 (0.001) | 0.407 (0.000) | 0.440 (0.001) | 0.467 (0.000) | 0.429 (0.023) | 14   |
| DyRep-h                 | 0.418 (0.005) | 0.516 (0.000) | 0.432 (0.011) | 0.464 (0.000) | 0.572 (0.038) | 0.714 (0.000) | 0.445 (0.015) | 6    |
| TGN-h                   | 0.725 (0.022) | 0.716 (0.000) | 0.557 (0.001) | 0.639 (0.002) | 0.586 (0.012) | 0.628 (0.000) | 0.623 (0.035) | 5    |
| JODIE-d                 | 0.418 (0.006) | 0.409 (0.001) | 0.354 (0.000) | 0.347 (0.000) | 0.439 (0.001) | 0.484 (0.000) | 0.405 (0.011) | 13   |
| DyRep-d                 | 0.414 (0.002) | 0.458 (0.000) | 0.424 (0.000) | 0.473 (0.000) | 0.582 (0.006) | 0.458 (0.000) | 0.458 (0.014) | 9    |
| TGN-d                   | 0.709 (0.038) | 0.714 (0.000) | 0.633 (0.000) | 0.624 (0.000) | 0.627 (0.030) | 0.575 (0.000) | 0.616 (0.090) | 4    |
| EdgeBank <sub>tw</sub>  | 0.688 (0.000) | 0.675 (0.000) | 0.541 (0.000) | 0.627 (0.000) | 0.567 (0.000) | 0.634 (0.000) | 0.701 (0.000) | 3    |
| EdgeBank <sub>∞</sub>   | 0.496 (0.000) | 0.504 (0.000) | 0.432 (0.000) | 0.497 (0.000) | 0.483 (0.000) | 0.512 (0.000) | 0.455 (0.000) | 10   |

  

| (c) Inductive Sampling |               |               |               |               |               |               |               |      |
|------------------------|---------------|---------------|---------------|---------------|---------------|---------------|---------------|------|
| Method                 | Wikipedia     | Reddit        | MOOC          | LastFM        | Enron         | Social Evo.   | UCI           | Rank |
| JODIE-s                | 0.412 (0.002) | 0.443 (0.003) | 0.445 (0.028) | 0.478 (0.002) | 0.473 (0.000) | 0.520 (0.013) | 0.500 (0.013) | 9    |
| DyRep-s                | 0.625 (0.004) | 0.483 (0.000) | 0.594 (0.003) | 0.527 (0.011) | 0.579 (0.018) | 0.716 (0.037) | 0.491 (0.005) | 6    |
| TGN-s                  | 0.833 (0.008) | 0.832 (0.000) | 0.630 (0.012) | 0.601 (0.008) | 0.695 (0.009) | 0.825 (0.019) | 0.771 (0.025) | 1    |
| JODIE-m                | 0.411 (0.001) | 0.443 (0.004) | 0.431 (0.015) | 0.476 (0.004) | 0.472 (0.001) | 0.510 (0.015) | 0.480 (0.006) | 12   |
| DyRep-m                | 0.611 (0.025) | 0.504 (0.000) | 0.557 (0.010) | 0.502 (0.008) | 0.580 (0.014) | 0.688 (0.029) | 0.498 (0.016) | 7    |
| TGN-m                  | 0.805 (0.000) | 0.807 (0.000) | 0.620 (0.015) | 0.640 (0.028) | 0.695 (0.010) | 0.870 (0.039) | 0.763 (0.025) | 2    |
| JODIE-h                | 0.415 (0.001) | 0.429 (0.000) | 0.412 (0.018) | 0.453 (0.000) | 0.473 (0.002) | 0.466 (0.000) | 0.483 (0.020) | 14   |
| DyRep-h                | 0.615 (0.011) | 0.579 (0.000) | 0.586 (0.004) | 0.501 (0.001) | 0.572 (0.031) | 0.699 (0.000) | 0.499 (0.010) | 5    |
| TGN-h                  | 0.708 (0.011) | 0.771 (0.000) | 0.531 (0.001) | 0.572 (0.000) | 0.640 (0.012) | 0.612 (0.000) | 0.630 (0.016) | 3    |
| JODIE-d                | 0.487 (0.012) | 0.498 (0.000) | 0.518 (0.000) | 0.418 (0.000) | 0.472 (0.000) | 0.481 (0.000) | 0.466 (0.005) | 13   |
| DyRep-d                | 0.614 (0.022) | 0.479 (0.000) | 0.566 (0.000) | 0.524 (0.000) | 0.589 (0.012) | 0.461 (0.000) | 0.514 (0.014) | 8    |
| TGN-d                  | 0.715 (0.023) | 0.746 (0.000) | 0.483 (0.000) | 0.539 (0.000) | 0.659 (0.017) | 0.558 (0.000) | 0.644 (0.041) | 4    |
| EdgeBank <sub>tw</sub> | 0.469 (0.000) | 0.473 (0.000) | 0.417 (0.000) | 0.481 (0.000) | 0.506 (0.000) | 0.609 (0.000) | 0.566 (0.000) | 11   |
| EdgeBank <sub>∞</sub>  | 0.477 (0.000) | 0.485 (0.000) | 0.417 (0.000) | 0.487 (0.000) | 0.497 (0.000) | 0.536 (0.000) | 0.570 (0.000) | 10   |

Table B.10: AP of dynamic link prediction on the "hour" granularity data across three negative sampling strategies. Note that we report the mean AP over three runs with the standard deviations in parenthesis, and the rank is computed by averaging the ranks over all datasets.

| (a) Random Sampling    |               |               |               |               |               |               |               |      |
|------------------------|---------------|---------------|---------------|---------------|---------------|---------------|---------------|------|
| Method                 | Wikipedia     | Reddit        | MOOC          | LastFM        | Enron         | Social Evo.   | UCI           | Rank |
| JODIE-s                | 0.992 (0.001) | 0.989 (0.001) | 0.779 (0.010) | 0.994 (0.000) | 0.933 (0.006) | 0.760 (0.042) | 0.993 (0.001) | 3    |
| DyRep-s                | 0.573 (0.013) | 0.515 (0.000) | 0.599 (0.006) | 0.528 (0.004) | 0.636 (0.014) | 0.730 (0.037) | 0.823 (0.002) | 14   |
| TGN-s                  | 0.952 (0.005) | 0.895 (0.000) | 0.594 (0.015) | 0.660 (0.012) | 0.775 (0.031) | 0.613 (0.024) | 0.837 (0.003) | 6    |
| JODIE-m                | 0.994 (0.000) | 0.988 (0.000) | 0.778 (0.005) | 0.994 (0.000) | 0.929 (0.004) | 0.772 (0.031) | 0.994 (0.001) | 2    |
| DyRep-m                | 0.639 (0.018) | 0.540 (0.000) | 0.576 (0.028) | 0.525 (0.004) | 0.643 (0.004) | 0.671 (0.047) | 0.830 (0.015) | 13   |
| TGN-m                  | 0.956 (0.002) | 0.830 (0.000) | 0.602 (0.035) | 0.664 (0.015) | 0.775 (0.031) | 0.592 (0.048) | 0.830 (0.070) | 7    |
| JODIE-h                | 0.993 (0.001) | 0.993 (0.000) | 0.802 (0.006) | 0.994 (0.000) | 0.927 (0.017) | 0.882 (0.000) | 0.994 (0.001) | 1    |
| DyRep-h                | 0.676 (0.006) | 0.631 (0.000) | 0.629 (0.002) | 0.528 (0.000) | 0.612 (0.038) | 0.670 (0.000) | 0.824 (0.015) | 11   |
| TGN-h                  | 0.960 (0.001) | 0.967 (0.000) | 0.682 (0.000) | 0.687 (0.000) | 0.739 (0.023) | 0.787 (0.000) | 0.833 (0.015) | 5    |
| JODIE-d                | 0.981 (0.004) | 0.926 (0.000) | 0.738 (0.000) | 0.946 (0.000) | 0.922 (0.007) | 0.738 (0.000) | 0.994 (0.001) | 4    |
| DyRep-d                | 0.616 (0.022) | 0.535 (0.000) | 0.626 (0.000) | 0.523 (0.000) | 0.652 (0.012) | 0.490 (0.000) | 0.837 (0.008) | 12   |
| TGN-d                  | 0.946 (0.003) | 0.925 (0.000) | 0.609 (0.000) | 0.597 (0.000) | 0.765 (0.016) | 0.596 (0.000) | 0.835 (0.027) | 8    |
| EdgeBank <sub>tw</sub> | 0.887 (0.000) | 0.921 (0.000) | 0.576 (0.000) | 0.784 (0.000) | 0.826 (0.000) | 0.556 (0.000) | 0.730 (0.000) | 9    |
| EdgeBank <sub>∞</sub>  | 0.908 (0.000) | 0.949 (0.000) | 0.529 (0.000) | 0.761 (0.000) | 0.811 (0.000) | 0.520 (0.000) | 0.739 (0.000) | 10   |

  

| (b) Historical Sampling |               |               |               |               |               |               |               |      |
|-------------------------|---------------|---------------|---------------|---------------|---------------|---------------|---------------|------|
| Method                  | Wikipedia     | Reddit        | MOOC          | LastFM        | Enron         | Social Evo.   | UCI           | Rank |
| JODIE-s                 | 0.421 (0.002) | 0.449 (0.000) | 0.334 (0.002) | 0.455 (0.002) | 0.441 (0.002) | 0.441 (0.013) | 0.457 (0.017) | 11   |
| DyRep-s                 | 0.424 (0.006) | 0.486 (0.000) | 0.450 (0.014) | 0.474 (0.012) | 0.583 (0.019) | 0.720 (0.047) | 0.437 (0.006) | 7    |
| TGN-s                   | 0.689 (0.034) | 0.638 (0.000) | 0.551 (0.036) | 0.588 (0.012) | 0.635 (0.025) | 0.658 (0.073) | 0.587 (0.034) | 5    |
| JODIE-m                 | 0.422 (0.001) | 0.449 (0.000) | 0.332 (0.001) | 0.451 (0.007) | 0.442 (0.000) | 0.436 (0.006) | 0.431 (0.009) | 13   |
| DyRep-m                 | 0.424 (0.006) | 0.416 (0.000) | 0.478 (0.054) | 0.465 (0.003) | 0.592 (0.002) | 0.695 (0.036) | 0.436 (0.018) | 8    |
| TGN-m                   | 0.704 (0.008) | 0.638 (0.000) | 0.571 (0.016) | 0.627 (0.036) | 0.635 (0.024) | 0.552 (0.056) | 0.572 (0.114) | 5    |
| JODIE-h                 | 0.420 (0.003) | 0.405 (0.000) | 0.330 (0.001) | 0.407 (0.000) | 0.442 (0.001) | 0.466 (0.000) | 0.430 (0.027) | 14   |
| DyRep-h                 | 0.422 (0.002) | 0.496 (0.000) | 0.430 (0.016) | 0.461 (0.000) | 0.575 (0.034) | 0.705 (0.000) | 0.445 (0.019) | 6    |
| TGN-h                   | 0.728 (0.008) | 0.712 (0.000) | 0.516 (0.001) | 0.643 (0.000) | 0.591 (0.022) | 0.854 (0.000) | 0.695 (0.021) | 1    |
| JODIE-d                 | 0.421 (0.007) | 0.426 (0.000) | 0.333 (0.000) | 0.347 (0.000) | 0.440 (0.001) | 0.458 (0.000) | 0.406 (0.010) | 12   |
| DyRep-d                 | 0.415 (0.004) | 0.471 (0.000) | 0.426 (0.000) | 0.470 (0.000) | 0.593 (0.013) | 0.461 (0.000) | 0.456 (0.017) | 9    |
| TGN-d                   | 0.707 (0.043) | 0.689 (0.000) | 0.573 (0.000) | 0.609 (0.000) | 0.627 (0.034) | 0.678 (0.000) | 0.619 (0.087) | 2    |
| EdgeBank <sub>tw</sub>  | 0.689 (0.000) | 0.676 (0.000) | 0.541 (0.000) | 0.627 (0.000) | 0.568 (0.000) | 0.633 (0.000) | 0.701 (0.000) | 3    |
| EdgeBank <sub>∞</sub>   | 0.496 (0.000) | 0.504 (0.000) | 0.432 (0.000) | 0.497 (0.000) | 0.483 (0.000) | 0.512 (0.000) | 0.455 (0.000) | 10   |

  

| (c) Inductive Sampling |               |               |               |               |               |               |               |      |
|------------------------|---------------|---------------|---------------|---------------|---------------|---------------|---------------|------|
| Method                 | Wikipedia     | Reddit        | MOOC          | LastFM        | Enron         | Social Evo.   | UCI           | Rank |
| JODIE-s                | 0.412 (0.002) | 0.454 (0.000) | 0.421 (0.029) | 0.477 (0.002) | 0.474 (0.001) | 0.441 (0.013) | 0.500 (0.013) | 10   |
| DyRep-s                | 0.606 (0.009) | 0.555 (0.000) | 0.572 (0.004) | 0.519 (0.002) | 0.584 (0.013) | 0.720 (0.045) | 0.488 (0.006) | 6    |
| TGN-s                  | 0.686 (0.020) | 0.649 (0.000) | 0.519 (0.012) | 0.560 (0.015) | 0.679 (0.019) | 0.654 (0.069) | 0.620 (0.047) | 3    |
| JODIE-m                | 0.411 (0.001) | 0.454 (0.000) | 0.406 (0.010) | 0.475 (0.005) | 0.474 (0.001) | 0.436 (0.007) | 0.479 (0.005) | 14   |
| DyRep-m                | 0.650 (0.017) | 0.460 (0.000) | 0.545 (0.023) | 0.524 (0.010) | 0.587 (0.008) | 0.689 (0.036) | 0.493 (0.014) | 7    |
| TGN-m                  | 0.691 (0.005) | 0.675 (0.000) | 0.539 (0.017) | 0.581 (0.024) | 0.679 (0.019) | 0.551 (0.054) | 0.625 (0.075) | 4    |
| JODIE-h                | 0.415 (0.001) | 0.426 (0.000) | 0.403 (0.016) | 0.452 (0.001) | 0.474 (0.002) | 0.467 (0.000) | 0.481 (0.020) | 13   |
| DyRep-h                | 0.623 (0.005) | 0.576 (0.000) | 0.584 (0.000) | 0.516 (0.001) | 0.572 (0.028) | 0.696 (0.000) | 0.496 (0.015) | 5    |
| TGN-h                  | 0.710 (0.007) | 0.820 (0.000) | 0.589 (0.000) | 0.576 (0.001) | 0.643 (0.006) | 0.847 (0.000) | 0.692 (0.006) | 1    |
| JODIE-d                | 0.489 (0.013) | 0.552 (0.000) | 0.446 (0.000) | 0.416 (0.000) | 0.471 (0.000) | 0.458 (0.000) | 0.466 (0.003) | 11   |
| DyRep-d                | 0.606 (0.013) | 0.482 (0.000) | 0.587 (0.000) | 0.511 (0.000) | 0.597 (0.010) | 0.466 (0.000) | 0.509 (0.020) | 8    |
| TGN-d                  | 0.719 (0.029) | 0.731 (0.000) | 0.484 (0.000) | 0.537 (0.000) | 0.659 (0.014) | 0.661 (0.000) | 0.646 (0.042) | 2    |
| EdgeBank <sub>tw</sub> | 0.469 (0.000) | 0.473 (0.000) | 0.417 (0.000) | 0.481 (0.000) | 0.506 (0.000) | 0.609 (0.000) | 0.566 (0.000) | 12   |
| EdgeBank <sub>∞</sub>  | 0.477 (0.000) | 0.485 (0.000) | 0.417 (0.000) | 0.487 (0.000) | 0.497 (0.000) | 0.536 (0.000) | 0.570 (0.000) | 9    |

Table B.11: AP of dynamic link prediction on the "day" granularity data across three negative sampling strategies. Note that we report the mean AP over three runs with the standard deviations in parenthesis, and the rank is computed by averaging the ranks over all datasets.

| (a) Random Sampling     |               |               |               |               |               |               |               |      |
|-------------------------|---------------|---------------|---------------|---------------|---------------|---------------|---------------|------|
| Method                  | Wikipedia     | Reddit        | MOOC          | LastFM        | Enron         | Social Evo.   | UCI           | Rank |
| JODIE-s                 | 0.958 (0.006) | 0.934 (0.013) | 0.717 (0.001) | 0.882 (0.007) | 0.909 (0.001) | 0.587 (0.056) | 0.991 (0.002) | 4    |
| DyRep-s                 | 0.587 (0.047) | 0.522 (0.000) | 0.592 (0.015) | 0.531 (0.004) | 0.630 (0.023) | 0.621 (0.037) | 0.814 (0.009) | 14   |
| TGN-s                   | 0.922 (0.005) | 0.847 (0.000) | 0.584 (0.034) | 0.635 (0.017) | 0.699 (0.044) | 0.532 (0.046) | 0.835 (0.026) | 9    |
| JODIE-m                 | 0.969 (0.002) | 0.936 (0.003) | 0.711 (0.007) | 0.876 (0.004) | 0.898 (0.008) | 0.556 (0.037) | 0.993 (0.001) | 1    |
| DyRep-m                 | 0.616 (0.033) | 0.546 (0.000) | 0.575 (0.025) | 0.526 (0.006) | 0.633 (0.010) | 0.612 (0.031) | 0.813 (0.021) | 12   |
| TGN-m                   | 0.941 (0.004) | 0.857 (0.000) | 0.599 (0.027) | 0.643 (0.008) | 0.700 (0.044) | 0.493 (0.016) | 0.820 (0.070) | 7    |
| JODIE-h                 | 0.966 (0.004) | 0.965 (0.000) | 0.724 (0.006) | 0.888 (0.000) | 0.897 (0.014) | 0.682 (0.052) | 0.993 (0.001) | 2    |
| DyRep-h                 | 0.648 (0.005) | 0.539 (0.000) | 0.600 (0.003) | 0.518 (0.000) | 0.599 (0.053) | 0.649 (0.019) | 0.818 (0.015) | 13   |
| TGN-h                   | 0.929 (0.010) | 0.947 (0.000) | 0.676 (0.000) | 0.645 (0.000) | 0.730 (0.033) | 0.568 (0.045) | 0.788 (0.025) | 6    |
| JODIE-d                 | 0.982 (0.002) | 0.933 (0.000) | 0.720 (0.000) | 0.894 (0.000) | 0.913 (0.001) | 0.642 (0.015) | 0.993 (0.001) | 3    |
| DyRep-d                 | 0.691 (0.002) | 0.592 (0.000) | 0.615 (0.000) | 0.539 (0.000) | 0.655 (0.009) | 0.538 (0.015) | 0.828 (0.007) | 11   |
| TGN-d                   | 0.951 (0.000) | 0.961 (0.000) | 0.620 (0.000) | 0.655 (0.000) | 0.752 (0.029) | 0.704 (0.036) | 0.840 (0.029) | 5    |
| EdgeBank <sub>tw</sub>  | 0.887 (0.000) | 0.921 (0.000) | 0.576 (0.000) | 0.784 (0.000) | 0.826 (0.000) | 0.556 (0.000) | 0.730 (0.000) | 8    |
| EdgeBank <sub>∞</sub>   | 0.908 (0.000) | 0.949 (0.000) | 0.529 (0.000) | 0.761 (0.000) | 0.811 (0.000) | 0.520 (0.000) | 0.739 (0.000) | 10   |
| (b) Historical Sampling |               |               |               |               |               |               |               |      |
| Method                  | Wikipedia     | Reddit        | MOOC          | LastFM        | Enron         | Social Evo.   | UCI           | Rank |
| JODIE-s                 | 0.421 (0.001) | 0.411 (0.002) | 0.339 (0.001) | 0.432 (0.000) | 0.438 (0.001) | 0.418 (0.016) | 0.457 (0.017) | 12   |
| DyRep-s                 | 0.434 (0.002) | 0.465 (0.000) | 0.459 (0.022) | 0.464 (0.008) | 0.582 (0.022) | 0.621 (0.033) | 0.440 (0.009) | 7    |
| TGN-s                   | 0.690 (0.027) | 0.633 (0.000) | 0.552 (0.041) | 0.559 (0.029) | 0.601 (0.014) | 0.565 (0.045) | 0.603 (0.034) | 5    |
| JODIE-m                 | 0.421 (0.001) | 0.412 (0.002) | 0.337 (0.002) | 0.431 (0.000) | 0.438 (0.000) | 0.409 (0.011) | 0.436 (0.012) | 13   |
| DyRep-m                 | 0.427 (0.006) | 0.476 (0.000) | 0.502 (0.057) | 0.451 (0.001) | 0.589 (0.011) | 0.631 (0.023) | 0.435 (0.014) | 9    |
| TGN-m                   | 0.679 (0.005) | 0.699 (0.000) | 0.564 (0.042) | 0.626 (0.033) | 0.601 (0.015) | 0.512 (0.044) | 0.553 (0.106) | 4    |
| JODIE-h                 | 0.420 (0.000) | 0.417 (0.000) | 0.336 (0.003) | 0.430 (0.000) | 0.437 (0.000) | 0.450 (0.022) | 0.432 (0.023) | 14   |
| DyRep-h                 | 0.419 (0.003) | 0.531 (0.000) | 0.449 (0.012) | 0.449 (0.001) | 0.573 (0.036) | 0.656 (0.027) | 0.445 (0.016) | 8    |
| TGN-h                   | 0.688 (0.047) | 0.693 (0.000) | 0.467 (0.001) | 0.648 (0.001) | 0.581 (0.033) | 0.631 (0.063) | 0.627 (0.008) | 3    |
| JODIE-d                 | 0.415 (0.004) | 0.426 (0.000) | 0.337 (0.000) | 0.353 (0.000) | 0.438 (0.000) | 0.436 (0.006) | 0.407 (0.009) | 11   |
| DyRep-d                 | 0.421 (0.001) | 0.467 (0.000) | 0.420 (0.000) | 0.485 (0.000) | 0.604 (0.016) | 0.488 (0.008) | 0.455 (0.015) | 6    |
| TGN-d                   | 0.690 (0.044) | 0.725 (0.001) | 0.562 (0.000) | 0.591 (0.000) | 0.620 (0.044) | 0.776 (0.036) | 0.619 (0.089) | 1    |
| EdgeBank <sub>tw</sub>  | 0.689 (0.000) | 0.676 (0.000) | 0.541 (0.000) | 0.627 (0.000) | 0.568 (0.000) | 0.633 (0.000) | 0.701 (0.000) | 2    |
| EdgeBank <sub>∞</sub>   | 0.496 (0.000) | 0.504 (0.000) | 0.432 (0.000) | 0.497 (0.000) | 0.483 (0.000) | 0.512 (0.000) | 0.455 (0.000) | 10   |
| EdgeBank <sub>∞</sub>   | 0.908 (0.000) | 0.949 (0.000) | 0.529 (0.000) | 0.761 (0.000) | 0.811 (0.000) | 0.520 (0.000) | 0.739 (0.000) | 10   |
| (c) Inductive Sampling  |               |               |               |               |               |               |               |      |
| Method                  | Wikipedia     | Reddit        | MOOC          | LastFM        | Enron         | Social Evo.   | UCI           | Rank |
| JODIE-s                 | 0.400 (0.000) | 0.441 (0.003) | 0.377 (0.024) | 0.458 (0.000) | 0.469 (0.001) | 0.423 (0.015) | 0.497 (0.012) | 11   |
| DyRep-s                 | 0.589 (0.014) | 0.522 (0.000) | 0.565 (0.037) | 0.523 (0.003) | 0.586 (0.017) | 0.617 (0.034) | 0.492 (0.009) | 5    |
| TGN-s                   | 0.667 (0.019) | 0.644 (0.000) | 0.532 (0.029) | 0.543 (0.029) | 0.631 (0.032) | 0.555 (0.035) | 0.637 (0.023) | 4    |
| JODIE-m                 | 0.401 (0.001) | 0.442 (0.003) | 0.363 (0.011) | 0.458 (0.000) | 0.469 (0.000) | 0.413 (0.009) | 0.482 (0.010) | 12   |
| DyRep-m                 | 0.602 (0.010) | 0.522 (0.000) | 0.544 (0.024) | 0.507 (0.008) | 0.582 (0.013) | 0.620 (0.023) | 0.486 (0.011) | 8    |
| TGN-m                   | 0.675 (0.013) | 0.709 (0.000) | 0.542 (0.009) | 0.558 (0.007) | 0.631 (0.032) | 0.527 (0.050) | 0.605 (0.080) | 3    |
| JODIE-h                 | 0.399 (0.000) | 0.448 (0.000) | 0.366 (0.015) | 0.457 (0.001) | 0.467 (0.002) | 0.457 (0.026) | 0.480 (0.017) | 14   |
| DyRep-h                 | 0.572 (0.009) | 0.592 (0.000) | 0.537 (0.015) | 0.501 (0.001) | 0.570 (0.033) | 0.644 (0.026) | 0.498 (0.011) | 6    |
| TGN-h                   | 0.654 (0.011) | 0.797 (0.000) | 0.503 (0.000) | 0.565 (0.001) | 0.633 (0.016) | 0.610 (0.056) | 0.656 (0.003) | 2    |
| JODIE-d                 | 0.426 (0.007) | 0.527 (0.001) | 0.402 (0.000) | 0.408 (0.000) | 0.469 (0.001) | 0.440 (0.004) | 0.463 (0.005) | 13   |
| DyRep-d                 | 0.530 (0.009) | 0.507 (0.000) | 0.545 (0.000) | 0.520 (0.000) | 0.599 (0.010) | 0.490 (0.004) | 0.504 (0.015) | 7    |
| TGN-d                   | 0.702 (0.020) | 0.832 (0.001) | 0.529 (0.000) | 0.591 (0.000) | 0.662 (0.024) | 0.749 (0.036) | 0.649 (0.040) | 1    |
| EdgeBank <sub>tw</sub>  | 0.469 (0.000) | 0.473 (0.000) | 0.417 (0.000) | 0.481 (0.000) | 0.506 (0.000) | 0.609 (0.000) | 0.566 (0.000) | 10   |
| EdgeBank <sub>∞</sub>   | 0.477 (0.000) | 0.485 (0.000) | 0.417 (0.000) | 0.487 (0.000) | 0.497 (0.000) | 0.536 (0.000) | 0.570 (0.000) | 9    |
